# Supplementary material for: Atherogenic Dyslipidemia in Children: Evaluation of Clinical, Biochemical and Genetic Aspects
Source: PubMed Central journal article supplement (PMC4405441; doi:10.1371/journal.pone.0120099), 2015-04-21
Supplement: pone.0120099.s002.pdf [file pone.0120099.s002.pdf]

**S2 Table.** Primers for PCR amplification and cycle sequencing of *APOA1* and *LPL* genes.**A) Primers for PCR amplification of APOA1.**

| ANALYZED ZONE          | FORWARD                     | REVERSE                    | PRODUCT SIZE (bp) | Ta (°C) |
|------------------------|-----------------------------|----------------------------|-------------------|---------|
| 5' UTR - exon 3        | 5'-TCCTCTGCCAACACAATGG-3'   | 5'GGCCAGGTCCTTCACTCG-3'    | 878               | 58      |
| Exon 2 – exon 4        | 5-TCCTGACGGGTAGGTGTCC-3'    | 5'-GCTGTCCCAGTTGTCAAGG-3'  | 970               | 58      |
| Intron 3 - 3' UTR (up) | 5'-CCAGCTCTGTCTCCTTTTAGC-3' | 5'-GCACGGAGTTGTTGAGATCC-3' | 981               | 58      |
| Exon 4 - 3' UTR (down) | 5'-GAGCTTCAAGGTCAGCTTCC-3'  | 5'-TCCTGGCCTGAAGTGATACG-3' | 1151              | 58      |

**B) Primers for cycle sequencing of APOA1.**

| ApoA1                           | FORWARD                     | REVERSE                     | PRODUCT SIZE (bp) | Ta (°C) |
|---------------------------------|-----------------------------|-----------------------------|-------------------|---------|
| 5' UTR (up) – intron 1          | 5'-CTCCCATGGAGGGGAAGG-3'    | 5'-CACAGAGCGGGAGAAGACC-3'   | 421               | 58      |
| 5' UTR (down) – intron 2 (down) | 5'-TGGCTGCAGACATAAATAGGC-3' | 5'-CTGAGATCTGAGCCGAAAGG-3'  | 465               | 58      |
| Intron 2 (up) – intron 3 (up 1) | 5'-CCTAACCTAGGGAGCCAACC-3'  | 5'-GCCAGCTCATCAGATATTAGG-3' | 441               | 58      |
| Exon 3 – intron 3 (down)        | 5'-GCGGCAGAGACTATGTGTCC-3'  | 5'-GCAGTGGCCTAGCATTTC-3'    | 554               | 58      |
| Intron 3 (up 2) – exon 4 (down) | 5'-CCTTTTAGCTCCTCTCTGTGC-3' | 5'-AGCTCGTGCAGCTTCTGG-3'    | 476               | 58      |
| Exon 4 (up) – 3' UTR (up)       | 5'-AGCTCTACCGCCAGAAGG-3'    | 5'-AAGCTGCTTCCCATTGG-3'     | 459               | 58      |
| Exon 4 (down) – 3' UTR (down)   | 5'-AAGCTCAACACCCAGTGAGG-3'  | 5'-TAGTGGGAGGGGATACTGG-3'   | 657               | 58      |
| 3' UTR (distal)                 | 5'-GAAGCGCTTGGAGTTTGC-3'    | 5'-TGATACGCCACCTCAGC-3'     | 537               | 58      |

**C) Primers for PCR amplification and cycle sequencing of LPL.**

| ANALYZED ZONE                                        | FORWARD                       | REVERSE                      | PRODUCT SIZE (bp) | Ta (°C) |
|------------------------------------------------------|-------------------------------|------------------------------|-------------------|---------|
| 5' UTR                                               | 5'-CGTGAATCGATGTAAACCTGTG-3'  | 5'-GTTTGGCGCTGAGCAAGT-3'     | 377               | 58      |
| Exon 1 and adjacent intronic zones                   | 5'-CAGTCACATAAGCAGCCTT-3'     | 5'-TTCCAACCTCCTTCTTCTC-3'    | 401               | 58      |
| Exon 2 and adjacent intronic zones                   | 5'-CGTTGGAGCATCTGTTGTTCT-3'   | 5'-ATGTGGGGTGCGGACCCATC-3'   | 427               | 58      |
| Exon 3 and adjacent intronic zones                   | 5'-TTGGGCTGATGTATCTATGAC-3'   | 5'-GGCAGGACTATTTATTGGC-3'    | 451               | 58      |
| Exon 4 and adjacent intronic zones                   | 5'-ATTTTTGGCAGAACTGTAAGCAC-3' | 5'-AAATCTGCAGGCATTGTGTG-3'   | 408               | 58      |
| Exon 5 and adjacent intronic zones                   | 5'-TCATTTTAGAAGGAGCCAAG-3'    | 5'-GTGGTCATGCTGAACATTG-3'    | 569               | 58      |
| Exon 6 and adjacent intronic zones                   | 5'-ACTCTCTTGAAGGTGGGTGG-3'    | 5'-ATGGGAATTAGAAGCCTCAGAC-3' | 624               | 58      |
| Exon 7 and adjacent intronic zones                   | 5'-TTCCATGTGTGTGCACTTCC-3'    | 5'-CTTGTTTTCTAGGCATCGCTCT-3' | 350               | 58      |
| Exon 8 and adjacent intronic zones                   | 5'-GCAGGGAGAGCTGATCTTATAA-3'  | 5'-TGTGAAGGCCCTGAAATAC-3'    | 318               | 58      |
| Exon 9 and adjacent intronic zones                   | 5'-CCCTCTGATTCTGATGTGGC-3'    | 5'-CTGGTGATGGGGTGAAGAG-3'    | 363               | 58      |
| Exon 10 and intron 9 adjacent intronic zone - 3' UTR | 5'-GTCTTCCATTCTACAAACCTG-3'   | 5'-TTTTACTCTGCGCTCAAACAAT-3' | 497               | 58      |
