# Supplementary material for: Atherogenic Dyslipidemia in Children: Evaluation of Clinical, Biochemical and Genetic Aspects
Source: PubMed Central journal article supplement (PMC4405441; doi:10.1371/journal.pone.0120099), 2015-04-21
Supplement: pone.0120099.s003.pdf [file pone.0120099.s003.pdf]

**S3 Table** . Primers for minisequencing in the LPL gene. The underlined nucleotides are the mobility tail added.

| VARIATION   | PRIMER                                                       |
|-------------|--------------------------------------------------------------|
| p.Asp9Asn   | 5'- <u>GGAAAAGAGAAAGGAAAAAAAA</u> TTCCAGAAAGAAGAGATTTTATC-3' |
| p.Ser45Asn  | 5'- <u>AAAAAA</u> CTACCTGTCATTTCAATCACA-3'                   |
| p.Asn291Ser | 5'-AATCTGGGCTATGAGATCA-3'                                    |
| p.Leu365Val | 5'- <u>AAAGGAAAACACAAATAAGACCTACTCCTTC</u> -3'               |
| p.Ser447*   | 5'- <u>AGAAAAAAGGGAAAAA</u> ATGACAAGTCTCTGAATAAGAAGT-3'      |
