# Supplementary material for: Atherogenic Dyslipidemia in Children: Evaluation of Clinical, Biochemical and Genetic Aspects
Source: PubMed Central journal article supplement (PMC4405441; doi:10.1371/journal.pone.0120099), 2015-04-21
Supplement: pone.0120099.s004.pdf [file pone.0120099.s004.pdf]

**S4 Table. Correlations between variables in the whole group of study children (n=283)**

| <b>Variables</b>   | <b>Age</b> | <b>TC</b> | <b>HDL-C</b> | <b>TG</b> | <b>LDL-C</b> | <b>FBG</b> | <b>Insulin</b> | <b>hs-CRP</b> | <b>Apo B</b> | <b>Apo A1</b> | <b>Adiponectin</b> | <b>HOMA-IR</b> | <b>BMI</b> |
|--------------------|------------|-----------|--------------|-----------|--------------|------------|----------------|---------------|--------------|---------------|--------------------|----------------|------------|
| <b>TC</b>          | 0.025      |           |              |           |              |            |                |               |              |               |                    |                |            |
| <b>HDL-C</b>       | -0.006     | 0.224**   |              |           |              |            |                |               |              |               |                    |                |            |
| <b>TG</b>          | 0.070      | 0.008     | -0.532**     |           |              |            |                |               |              |               |                    |                |            |
| <b>LDL-C</b>       | 0.009      | 0.944**   | -0.013       | -0.096    |              |            |                |               |              |               |                    |                |            |
| <b>FBG</b>         | 0.221**    | 0.010     | -0.224**     | 0.300**   | 0.008        |            |                |               |              |               |                    |                |            |
| <b>Insulin</b>     | 0.486**    | -0.101    | -0.312**     | 0.356**   | -0.089       | 0.246**    |                |               |              |               |                    |                |            |
| <b>hs-CRP</b>      | -0.009     | -0.082    | -0.154*      | 0.007     | -0.021       | -0.055     | 0.160*         |               |              |               |                    |                |            |
| <b>ApoB</b>        | 0.020      | 0.579**   | -0.144*      | -0.014    | 0.671**      | 0.046      | 0.016          | 0.040         |              |               |                    |                |            |
| <b>Apo A1</b>      | 0.070      | 0.130*    | 0.589**      | -0.267**  | -0.024       | -0.096     | -0.166*        | -0.138*       | -0.042       |               |                    |                |            |
| <b>Adiponectin</b> | -0.381**   | 0.141     | 0.224*       | -0.142    | 0.093        | -0.061     | -0.353**       | -0.113        | 0.023        | 0.054         |                    |                |            |
| <b>HOMA-IR</b>     | 0.483**    | -0.066    | -0.332**     | 0.420**   | -0.063       | 0.424**    | 0.970**        | 0.151*        | 0.043        | -0.146*       | -0.343**           |                |            |
| <b>BMI</b>         | 0.410**    | -0.006    | -0.275**     | 0.323**   | 0.010        | 0.340**    | 0.575**        | 0.043         | 0.076        | -0.163*       | -0.413**           | 0.587**        |            |
| <b>Waist circ.</b> | 0.617**    | -0.060    | -0.373**     | 0.467**   | -0.044       | 0.190      | 0.712**        | 0.151         | 0.066        | -0.153        | -0.319*            | 0.649**        | 0.841**    |

TC, total cholesterol; HDL-C, high density lipoprotein cholesterol; TG, triglycerides; LDL-C, low density lipoprotein cholesterol; FBG, fasting blood glucose; hs-CRP, high sensitivity C Reactive Protein; HOMA-IR, HOmeostasis Model Assessment of IR index; BMI, body mass index

\*p< 0.05; \*\*p< 0.01
